# Supplementary material for: Gestational and lactational exposure to gossypol alters the testis transcriptome
Source: BMC Genomics. 2020 Jan 17;21:59. doi: 10.1186/s12864-020-6487-2 (PMC6969474; doi:10.1186/s12864-020-6487-2)
Supplement: Supplementary file 1 — Additional file 1. Sequencing and mapping statistics. [file 12864_2020_6487_MOESM1_ESM.xlsx]

## Sheet: Sheet1
Sample	Treatment	Raw Reads	Trimmed Reads	Mapped Reads	Mapping %
H01_GO	Gossypol	26669156	26591568	21462528	80.7118
H06_CT	Control	25384690	25314402	20461638	80.83
H08_GO	Gossypol	23038706	22935501	17449042	76.0787
H10_GO	Gossypol	24253902	24195729	19030049	78.6504
H12_GO	Gossypol	25194865	25136412	20523484	81.6484
H20_CT	Control	19887634	19834820	16673132	84.0599
H22_CT	Control	28945446	28879014	23991532	83.076
H25_GO	Gossypol	25029036	24965802	19889022	79.6651
H29_CT	Control	24851590	24793385	20197438	81.463
H31_CT	Control	23842300	23775579	18913406	79.5497
H32_CT	Control	20977314	20922227	16850958	80.5409
H35_GO	Gossypol	21030843	20949195	16268776	77.6582
H37_CT	Control	24693682	24644660	20555278	83.4066
H39_CT	Control	19969799	19896169	15489190	77.8501
H41_GO	Gossypol	26011370	25891056	21618635	83.4985
H44_CT	Control	25724395	25676961	21604920	84.1413
H47_GO	Gossypol	26340672	26279815	21651807	82.3895
H48_GO	Gossypol	26345682	26289327	21879707	83.2266
