# Supplementary material for: Gestational and lactational exposure to gossypol alters the testis transcriptome
Source: BMC Genomics. 2020 Jan 17;21:59. doi: 10.1186/s12864-020-6487-2 (PMC6969474; doi:10.1186/s12864-020-6487-2)
Supplement: Supplementary file 4 — Additional file 4. List of significant GO terms. [file 12864_2020_6487_MOESM4_ESM.xlsx]

## Sheet: GO terms
GOID	GO Name	Total Genes	Significant Genes	Up Genes	Down Genes	P-value
GO:0005506	iron ion binding	90	13	1	12	0.00013
GO:0020037	heme binding	83	12	1	11	0.00023
GO:0055085	transmembrane transport	364	30	14	16	0.00056
GO:0010954	positive regulation of protein processing	5	3	1	2	0.00076
GO:0031424	keratinization	5	3	3	0	0.00076
GO:0005576	extracellular region	305	26	16	10	0.00079
GO:0007154	cell communication	19	5	2	3	0.0011
GO:0016702	oxidoreductase activity, acting on single donors with incorporation of molecular oxygen, incorporation of two atoms of oxygen	12	4	0	4	0.0013
GO:0042742	defense response to bacterium	39	7	1	6	0.0013
GO:0001656	metanephros development	20	5	1	4	0.0014
GO:0043589	skin morphogenesis	6	3	0	3	0.0015
GO:0070208	protein heterotrimerization	6	3	0	3	0.0015
GO:0030199	collagen fibril organization	30	6	0	6	0.0016
GO:0006884	cell volume homeostasis	13	4	2	2	0.0018
GO:0005615	extracellular space	346	27	14	13	0.0023
GO:0003376	sphingosine-1-phosphate receptor signaling pathway	7	3	0	3	0.0025
GO:0016020	membrane	3510	182	64	118	0.0025
GO:0032228	regulation of synaptic transmission, GABAergic	7	3	1	2	0.0025
GO:0032964	collagen biosynthetic process	7	3	1	2	0.0025
GO:0061436	establishment of skin barrier	14	4	2	2	0.0025
GO:0071230	cellular response to amino acid stimulus	33	6	1	5	0.0026
GO:0048477	oogenesis	15	4	3	1	0.0033
GO:0055114	oxidation-reduction process	483	34	5	29	0.0037
GO:0007266	Rho protein signal transduction	25	5	2	3	0.0039
GO:0045824	negative regulation of innate immune response	8	3	1	2	0.0039
GO:0090331	negative regulation of platelet aggregation	8	3	1	2	0.0039
GO:0016705	oxidoreductase activity, acting on paired donors, with incorporation or reduction of molecular oxygen	49	7	1	6	0.0049
GO:0006952	defense response	17	4	0	4	0.0053
GO:0060349	bone morphogenesis	17	4	2	2	0.0053
GO:0004497	monooxygenase activity	38	6	0	6	0.0055
GO:0007165	signal transduction	496	34	13	21	0.0056
GO:0044295	axonal growth cone	9	3	1	2	0.0056
GO:0016021	integral component of membrane	3079	159	61	98	0.0063
GO:0005201	extracellular matrix structural constituent	29	5	1	4	0.0075
GO:0050660	flavin adenine dinucleotide binding	53	7	1	6	0.0076
GO:0005212	structural constituent of eye lens	10	3	3	0	0.0077
GO:0048407	platelet-derived growth factor binding	10	3	0	3	0.0077
GO:0000038	very long-chain fatty acid metabolic process	11	3	0	3	0.01
GO:0005581	collagen trimer	31	5	1	4	0.01
GO:0007283	spermatogenesis	145	13	5	8	0.01
GO:0032720	negative regulation of tumor necrosis factor production	32	5	2	3	0.011
GO:0062023	collagen-containing extracellular matrix	57	7	2	5	0.011
GO:0120162	positive regulation of cold-induced thermogenesis	44	6	1	5	0.011
GO:0007628	adult walking behavior	21	4	3	1	0.012
GO:0030198	extracellular matrix organization	59	7	3	4	0.013
GO:0048662	negative regulation of smooth muscle cell proliferation	12	3	0	3	0.013
GO:0004415	hyalurononglucosaminidase activity	5	2	0	2	0.017
GO:0004860	protein kinase inhibitor activity	13	3	0	3	0.017
GO:0005921	gap junction	13	3	1	2	0.017
GO:0016477	cell migration	106	10	3	7	0.017
GO:0019372	lipoxygenase pathway	5	2	0	2	0.017
GO:0019395	fatty acid oxidation	5	2	0	2	0.017
GO:0030100	regulation of endocytosis	13	3	0	3	0.017
GO:0032050	clathrin heavy chain binding	5	2	0	2	0.017
GO:0033299	secretion of lysosomal enzymes	5	2	0	2	0.017
GO:0045671	negative regulation of osteoclast differentiation	13	3	0	3	0.017
GO:0048387	negative regulation of retinoic acid receptor signaling pathway	5	2	0	2	0.017
GO:0048853	forebrain morphogenesis	5	2	1	1	0.017
GO:0060351	cartilage development involved in endochondral bone morphogenesis	5	2	1	1	0.017
GO:0101005	ubiquitinyl hydrolase activity	5	2	0	2	0.017
GO:1902494	catalytic complex	5	2	1	1	0.017
GO:1904468	negative regulation of tumor necrosis factor secretion	5	2	0	2	0.017
GO:2001234	negative regulation of apoptotic signaling pathway	24	4	2	2	0.019
GO:0001736	establishment of planar polarity	14	3	1	2	0.021
GO:0002009	morphogenesis of an epithelium	14	3	3	0	0.021
GO:0015267	channel activity	14	3	2	1	0.021
GO:0016328	lateral plasma membrane	25	4	2	2	0.021
GO:0045453	bone resorption	14	3	1	2	0.021
GO:0051893	regulation of focal adhesion assembly	14	3	0	3	0.021
GO:0055072	iron ion homeostasis	14	3	0	3	0.021
GO:1902042	negative regulation of extrinsic apoptotic signaling pathway via death domain receptors	14	3	1	2	0.021
GO:0001947	heart looping	26	4	2	2	0.024
GO:0008542	visual learning	26	4	1	3	0.024
GO:0019900	kinase binding	66	7	2	5	0.024
GO:0002027	regulation of heart rate	15	3	1	2	0.025
GO:0004565	beta-galactosidase activity	6	2	2	0	0.025
GO:0009925	basal plasma membrane	15	3	2	1	0.025
GO:0010544	negative regulation of platelet activation	6	2	1	1	0.025
GO:0035331	negative regulation of hippo signaling	6	2	1	1	0.025
GO:0035385	Roundabout signaling pathway	6	2	1	1	0.025
GO:0038036	sphingosine-1-phosphate receptor activity	6	2	0	2	0.025
GO:0043525	positive regulation of neuron apoptotic process	15	3	0	3	0.025
GO:0048715	negative regulation of oligodendrocyte differentiation	6	2	0	2	0.025
GO:0060113	inner ear receptor cell differentiation	6	2	1	1	0.025
GO:1904659	glucose transmembrane transport	6	2	1	1	0.025
GO:0045087	innate immune response	83	8	1	7	0.027
GO:0032587	ruffle membrane	40	5	1	4	0.028
GO:0004601	peroxidase activity	16	3	1	2	0.03
GO:0045736	negative regulation of cyclin-dependent protein serine/threonine kinase activity	16	3	0	3	0.03
GO:0060122	inner ear receptor cell stereocilium organization	16	3	2	1	0.03
GO:0098586	cellular response to virus	16	3	1	2	0.03
GO:1900182	positive regulation of protein localization to nucleus	16	3	1	2	0.03
GO:0001568	blood vessel development	41	5	0	5	0.031
GO:0043473	pigmentation	28	4	1	3	0.031
GO:0001659	temperature homeostasis	7	2	1	1	0.034
GO:0002260	lymphocyte homeostasis	7	2	0	2	0.034
GO:0004861	cyclin-dependent protein serine/threonine kinase inhibitor activity	7	2	0	2	0.034
GO:0005871	kinesin complex	7	2	0	2	0.034
GO:0005922	connexin complex	7	2	0	2	0.034
GO:0007155	cell adhesion	188	14	7	7	0.034
GO:0007270	neuron-neuron synaptic transmission	7	2	2	0	0.034
GO:0014044	Schwann cell development	7	2	0	2	0.034
GO:0014912	negative regulation of smooth muscle cell migration	7	2	0	2	0.034
GO:0016790	thiolester hydrolase activity	7	2	1	1	0.034
GO:0017185	peptidyl-lysine hydroxylation	7	2	1	1	0.034
GO:0018095	protein polyglutamylation	7	2	0	2	0.034
GO:0019226	transmission of nerve impulse	7	2	2	0	0.034
GO:0022409	positive regulation of cell-cell adhesion	7	2	2	0	0.034
GO:0030214	hyaluronan catabolic process	7	2	0	2	0.034
GO:0046470	phosphatidylcholine metabolic process	7	2	1	1	0.034
GO:0048148	behavioral response to cocaine	7	2	1	1	0.034
GO:0007159	leukocyte cell-cell adhesion	17	3	2	1	0.035
GO:0010906	regulation of glucose metabolic process	17	3	1	2	0.035
GO:0019915	lipid storage	17	3	0	3	0.035
GO:0021537	telencephalon development	17	3	3	0	0.035
GO:0043204	perikaryon	17	3	2	1	0.035
GO:0001843	neural tube closure	72	7	3	4	0.036
GO:0034765	regulation of ion transmembrane transport	43	5	4	1	0.037
GO:0005887	integral component of plasma membrane	245	17	4	13	0.038
GO:0007399	nervous system development	73	7	3	4	0.038
GO:0004866	endopeptidase inhibitor activity	18	3	3	0	0.041
GO:0005244	voltage-gated ion channel activity	44	5	4	1	0.041
GO:0005886	plasma membrane	1402	74	22	52	0.041
GO:0031012	extracellular matrix	90	8	4	4	0.041
GO:0051281	positive regulation of release of sequestered calcium ion into cytosol	18	3	0	3	0.041
GO:0097730	non-motile cilium	18	3	2	1	0.041
GO:0051897	positive regulation of protein kinase B signaling	59	6	2	4	0.042
GO:0005044	scavenger receptor activity	31	4	2	2	0.043
GO:0035023	regulation of Rho protein signal transduction	75	7	3	4	0.043
GO:0043588	skin development	31	4	1	3	0.043
GO:0001527	microfibril	8	2	2	0	0.044
GO:0006833	water transport	8	2	1	1	0.044
GO:0008483	transaminase activity	8	2	1	1	0.044
GO:0010717	regulation of epithelial to mesenchymal transition	8	2	0	2	0.044
GO:0021702	cerebellar Purkinje cell differentiation	8	2	2	0	0.044
GO:0021895	cerebral cortex neuron differentiation	8	2	1	1	0.044
GO:0032426	stereocilium tip	8	2	0	2	0.044
GO:0032695	negative regulation of interleukin-12 production	8	2	1	1	0.044
GO:0035050	embryonic heart tube development	8	2	1	1	0.044
GO:0042641	actomyosin	8	2	0	2	0.044
GO:0046621	negative regulation of organ growth	8	2	1	1	0.044
GO:0048168	regulation of neuronal synaptic plasticity	8	2	1	1	0.044
GO:0090181	regulation of cholesterol metabolic process	8	2	1	1	0.044
GO:0097435	supramolecular fiber organization	8	2	1	1	0.044
GO:0005891	voltage-gated calcium channel complex	19	3	3	0	0.047
GO:0043531	ADP binding	19	3	0	3	0.047
GO:0045746	negative regulation of Notch signaling pathway	19	3	1	2	0.047
GO:0050768	negative regulation of neurogenesis	19	3	3	0	0.047
GO:0017048	Rho GTPase binding	32	4	1	3	0.048
GO:0034446	substrate adhesion-dependent cell spreading	32	4	0	4	0.048
GO:0042060	wound healing	32	4	1	3	0.048
